# Supplementary material
Source: PubMed Central journal article supplement (PMC6380369)
Supplement: cb8b00972_si_001.pdf [file cb8b00972_si_001.pdf]

# Supporting Information

## Crystal structures of fumarate hydratases from *Leishmania major* in a complex with inhibitor 2-thiomalate

Patricia R. Feliciano<sup>1,2,3,4</sup>, Catherine L. Drennan<sup>1,2,3,\*</sup>, and Maria Cristina Nonato<sup>4,\*</sup>

<sup>1</sup>Howard Hughes Medical Institute, Massachusetts Institute of Technology, Cambridge, MA 02139.

<sup>2</sup>Department of Biology, Massachusetts Institute of Technology, Cambridge, MA 02139.

<sup>3</sup>Department of Chemistry, Massachusetts Institute of Technology, Cambridge, MA 02139.

<sup>4</sup>Laboratório de Cristalografia de Proteínas, Faculdade de Ciências Farmacêuticas de Ribeirão Preto, Universidade de São Paulo, São Paulo 14040-903, Brazil.

\* Correspondence: [cdrennan@mit.edu](mailto:cdrennan@mit.edu) or [cristy@fcfrp.usp.br](mailto:cristy@fcfrp.usp.br)

**Table S1.** Data collection and refinement statistics of LmFH isoforms

| <b>Data name</b>                                                 | <b>LmFH-1-thio</b>                   | <b>LmFH-2-thio</b>                                    | <b>LmFH-2-thio-S-peak<sup>a,b</sup></b>               |
|------------------------------------------------------------------|--------------------------------------|-------------------------------------------------------|-------------------------------------------------------|
| Co-crystallization                                               | <i>RS</i> -2-thiomalate              | <i>RS</i> -2-thiomalate                               | <i>RS</i> -2-thiomalate                               |
| Ligand in the structure                                          | <i>S</i> -2-thiomalate               | <i>S</i> -2-thiomalate                                | <i>S</i> -2-thiomalate                                |
| <b>Data collection</b>                                           |                                      |                                                       |                                                       |
| Space group                                                      | <i>P</i> 2 <sub>1</sub>              | <i>P</i> 2 <sub>1</sub> 2 <sub>1</sub> 2 <sub>1</sub> | <i>P</i> 2 <sub>1</sub> 2 <sub>1</sub> 2 <sub>1</sub> |
| Cell dimensions                                                  |                                      |                                                       |                                                       |
| <i>a</i> , <i>b</i> , <i>c</i> (Å)                               | 78.74, 138.44, 138.07                | 65.73, 84.68, 239.99                                  | 65.97, 84.82, 240.96                                  |
| $\alpha$ , $\beta$ , $\gamma$ (°)                                | 90, 90, 90                           | 90, 90, 90                                            | 90, 90, 90                                            |
| Wavelength (Å)                                                   | 0.9792                               | 0.9792                                                | 1.7969                                                |
| Resolution (Å)                                                   | 50 – 2.05 (2.09 – 2.05) <sup>c</sup> | 50 – 1.6 (1.63 – 1.60) <sup>c</sup>                   | 50 – 2.03 (2.07 – 2.03) <sup>c</sup>                  |
| No. of unique reflections                                        | 180,831                              | 178,641                                               | 166,783                                               |
| <i>R</i> <sub>sym</sub>                                          | 0.150 (0.605) <sup>c</sup>           | 0.135 (0.805) <sup>c</sup>                            | 0.163 (0.804) <sup>c</sup>                            |
| <i>I</i> / $\sigma$ ( <i>I</i> )                                 | 9.75 (1.33) <sup>c</sup>             | 10.16 (1.11) <sup>c</sup>                             | 25.56 (1.80) <sup>c</sup>                             |
| CC1/2                                                            | (0.706) <sup>c</sup>                 | (0.642) <sup>c</sup>                                  | (0.687) <sup>c</sup>                                  |
| Completeness (%)                                                 | 98.6 (94.7) <sup>c</sup>             | 99.8 (99.5) <sup>c</sup>                              | 99.5 (96.7) <sup>c</sup>                              |
| Redundancy                                                       | 6.3 (4.5) <sup>c</sup>               | 5.4 (4.8) <sup>c</sup>                                | 10.0 (5.0) <sup>c</sup>                               |
| <b>Refinement</b>                                                |                                      |                                                       |                                                       |
| No. of reflections used                                          | 180,807 (16,857) <sup>c</sup>        | 178,536 (16,623) <sup>c</sup>                         |                                                       |
| <i>R</i> <sub>work</sub> / <i>R</i> <sub>free</sub> <sup>d</sup> | 0.1594 / 0.2045                      | 0.1530 / 0.1699                                       |                                                       |
| No. atoms                                                        |                                      |                                                       |                                                       |
| Protein                                                          | 16,437                               | 8,647                                                 |                                                       |
| [4Fe-4S] cluster                                                 | 32                                   | 16                                                    |                                                       |
| <i>S</i> -2-thiomalate                                           | 54                                   | 36                                                    |                                                       |
| Glycerol                                                         | 48                                   | -                                                     |                                                       |
| Pentaethylene glycol                                             | 16                                   | -                                                     |                                                       |
| Tetraethylene glycol                                             | 26                                   | -                                                     |                                                       |
| Triethylene glycol                                               | 50                                   | -                                                     |                                                       |
| Di(hydroxyethyl)ether                                            | 14                                   | -                                                     |                                                       |
| Water                                                            | 870                                  | 821                                                   |                                                       |
| Average B-factors (Å <sup>2</sup> )                              |                                      |                                                       |                                                       |
| Protein                                                          | 28.5                                 | 17.8                                                  |                                                       |
| [4Fe-4S] cluster                                                 | 25.2                                 | 12.1                                                  |                                                       |
| <i>S</i> -2-thiomalate                                           | 16.5                                 | 6.8                                                   |                                                       |
| Glycerol                                                         | 30.7                                 | -                                                     |                                                       |
| Pentaethylene glycol                                             | 32.0                                 | -                                                     |                                                       |
| Tetraethylene glycol                                             | 20.6                                 | -                                                     |                                                       |
| Triethylene glycol                                               | 32.5                                 | -                                                     |                                                       |
| Di(hydroxyethyl)ether                                            | 30.0                                 | -                                                     |                                                       |
| Water                                                            | 25.5                                 | 28.1                                                  |                                                       |
| R.m.s deviations                                                 |                                      |                                                       |                                                       |
| Bond lengths (Å)                                                 | 0.008                                | 0.004                                                 |                                                       |
| Bond angles (°)                                                  | 1.021                                | 0.717                                                 |                                                       |
| Rotamer outliers (%)                                             | 1.03                                 | 0.57                                                  |                                                       |
| Ramachandran analysis <sup>e</sup> (%)                           |                                      |                                                       |                                                       |
| Favored                                                          | 96.4                                 | 97.3                                                  |                                                       |
| Allowed                                                          | 3.5                                  | 2.7                                                   |                                                       |
| Outliers                                                         | 0.1                                  | 0                                                     |                                                       |

<sup>a</sup> Bijvoet pairs were not merged during data processing.

<sup>b</sup> Structure was not refined to completion.

<sup>c</sup> Highest resolution shell is shown in parenthesis.

<sup>d</sup> *R*<sub>free</sub> was calculated with 5% of the data.

<sup>e</sup> Distribution of dihedral angles in Ramachandran diagram were calculated with *MolProbity* program.<sup>1</sup>

**Table S2.** Hydrogen bonds formed between residues of chains A and B from LmFH-1

| Hydrogen bond no. | Chain A   |              |                |       | Chain B   |              |                |       |          |
|-------------------|-----------|--------------|----------------|-------|-----------|--------------|----------------|-------|----------|
|                   | Atom name | Residue name | Residue number | Chain | Atom name | Residue name | Residue number | Chain | Distance |
| 1                 | O         | ALA          | 10             | A     | OH        | TYR          | 145            | B     | 2.12     |
| 2                 | OD1       | ASP          | 116            | A     | NE2       | HIS          | 316            | B     | 2.77     |
| 3                 | NH2       | ARG          | 126            | A     | O         | SER          | 182            | B     | 2.94     |
| 4                 | O         | VAL          | 132            | A     | NZ        | LYS          | 183            | B     | 2.94     |
| 5                 | O         | GLY          | 134            | A     | NZ        | LYS          | 183            | B     | 2.84     |
| 6                 | OD1       | ASP          | 136            | A     | NZ        | LYS          | 183            | B     | 2.83     |
| 7                 | OH        | TYR          | 145            | A     | O         | ALA          | 10             | B     | 2.34     |
| 8                 | O         | SER          | 156            | A     | N         | GLY          | 317            | B     | 2.94     |
| 9                 | N         | ASN          | 158            | A     | O         | ARG          | 315            | B     | 2.87     |
| 10                | O         | ASN          | 158            | A     | N         | ARG          | 315            | B     | 3.07     |
| 11                | O         | MET          | 163            | A     | NE        | ARG          | 312            | B     | 3.00     |
| 12                | O         | MET          | 163            | A     | NH2       | ARG          | 312            | B     | 2.86     |
| 13                | OE1       | GLU          | 166            | A     | NH2       | ARG          | 315            | B     | 3.03     |
| 14                | OE2       | GLU          | 166            | A     | NH2       | ARG          | 312            | B     | 3.18     |
| 15                | OE2       | GLU          | 166            | A     | NE        | ARG          | 315            | B     | 2.66     |
| 16                | OE1       | GLN          | 176            | A     | OG1       | THR          | 245            | B     | 2.87     |
| 17                | OE1       | GLN          | 176            | A     | OG        | SER          | 246            | B     | 2.52     |
| 18                | OD1       | ASP          | 178            | A     | NZ        | LYS          | 252            | B     | 2.72     |
| 19                | O         | LEU          | 179            | A     | N         | ALA          | 181            | B     | 2.86     |
| 20                | N         | ALA          | 181            | A     | O         | LEU          | 179            | B     | 2.79     |
| 21                | O         | SER          | 182            | A     | NH2       | ARG          | 126            | B     | 2.88     |
| 22                | NZ        | LYS          | 183            | A     | O         | VAL          | 132            | B     | 3.15     |
| 23                | NZ        | LYS          | 183            | A     | O         | GLY          | 134            | B     | 2.65     |
| 24                | NZ        | LYS          | 183            | A     | OD1       | ASP          | 136            | B     | 2.77     |
| 25                | O         | ALA          | 199            | A     | NE2       | GLN          | 206            | B     | 3.29     |
| 26                | OD1       | ASN          | 200            | A     | OG        | SER          | 319            | B     | 2.87     |
| 27                | ND2       | ASN          | 200            | A     | O         | ALA          | 318            | B     | 2.87     |
| 28                | O         | SER          | 202            | A     | NE2       | GLN          | 206            | B     | 2.92     |
| 29                | NE2       | GLN          | 206            | A     | O         | ALA          | 199            | B     | 3.19     |
| 30                | NE2       | GLN          | 206            | A     | O         | SER          | 202            | B     | 2.93     |
| 31                | O         | SER          | 210            | A     | NH2       | ARG          | 412            | B     | 2.73     |
| 32                | OG1       | THR          | 245            | A     | NE2       | GLN          | 176            | B     | 2.82     |
| 33                | OG        | SER          | 246            | A     | NE2       | GLN          | 176            | B     | 2.72     |
| 34                | OE2       | GLU          | 248            | A     | NZ        | LYS          | 255            | B     | 2.42     |
| 35                | NZ        | LYS          | 252            | A     | OD1       | ASP          | 178            | B     | 2.85     |
| 36                | NZ        | LYS          | 255            | A     | OE2       | GLU          | 248            | B     | 3.11     |
| 37                | NE        | ARG          | 312            | A     | O         | MET          | 163            | B     | 3.04     |
| 38                | NH2       | ARG          | 312            | A     | O         | MET          | 163            | B     | 2.86     |
| 39                | NH2       | ARG          | 312            | A     | OE2       | GLU          | 166            | B     | 3.03     |
| 40                | N         | ARG          | 315            | A     | O         | ASN          | 158            | B     | 3.07     |
| 41                | O         | ARG          | 315            | A     | N         | ASN          | 158            | B     | 2.93     |
| 42                | NE        | ARG          | 315            | A     | OE2       | GLU          | 166            | B     | 2.61     |
| 43                | NH2       | ARG          | 315            | A     | OE1       | GLU          | 166            | B     | 3.14     |
| 44                | NE2       | HIS          | 316            | A     | OD1       | ASP          | 116            | B     | 2.6      |
| 45                | N         | GLY          | 317            | A     | O         | SER          | 156            | B     | 2.86     |
| 46                | O         | ALA          | 318            | A     | ND2       | ASN          | 200            | B     | 2.77     |
| 47                | OG        | SER          | 319            | A     | OD1       | ASN          | 200            | B     | 2.88     |
| 48                | NH2       | ARG          | 412            | A     | O         | SER          | 210            | B     | 2.95     |

**Table S3.** Tacsimate composition and its variation\* in the presence of 2-thiomalate.

|                           | <b>100%<br/>Tacsimate<br/>pH 5</b> | <b>100%<br/>Tacsimate*<br/>pH 5 with 2-<br/>thiomalate</b> |
|---------------------------|------------------------------------|------------------------------------------------------------|
| Ammonium citrate tribasic | 0.25 M                             | 0.25 M                                                     |
| Sodium acetate trihydrate | 0.40 M                             | 0.40 M                                                     |
| Sodium formate            | 0.50 M                             | 0.50 M                                                     |
| Ammonium tartrate dibasic | 0.16 M                             | 0.16 M                                                     |
| <i>RS</i> -Malic acid     | 0.30 M                             | -                                                          |
| Malonic acid              | 1.83 M                             | -                                                          |
| Succinic acid             | 0.12 M                             | -                                                          |
| <i>RS</i> -2-thiomalate   | -                                  | 0.30 M                                                     |



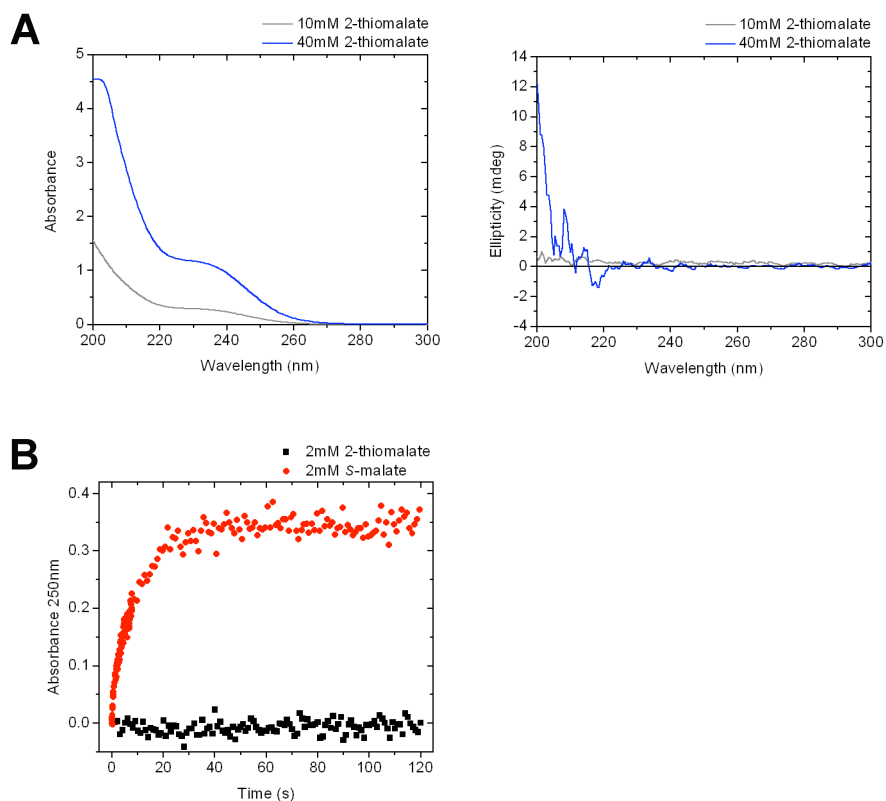

**Figure S1. *RS*-thiomalate characterization and use. (A) Circular dichroism (CD) of *RS*-2-thiomalate.** The *Left* and *Right* panels show absorption and CD spectra of *RS*-2-thiomalate (10 and 40 mM), respectively. No chiroptical signals were observed in the CD spectra (~240 nm) indicating that *RS*-2-thiomalate is a 50:50 racemic mixture. **(B) Activity of LmFH-2 with *S*-malate and *RS*-2-thiomalate as substrate.** The production of fumarate was measured spectrophotometrically at 250 nm. No production of fumarate was observed with *RS*-2-thiomalate.

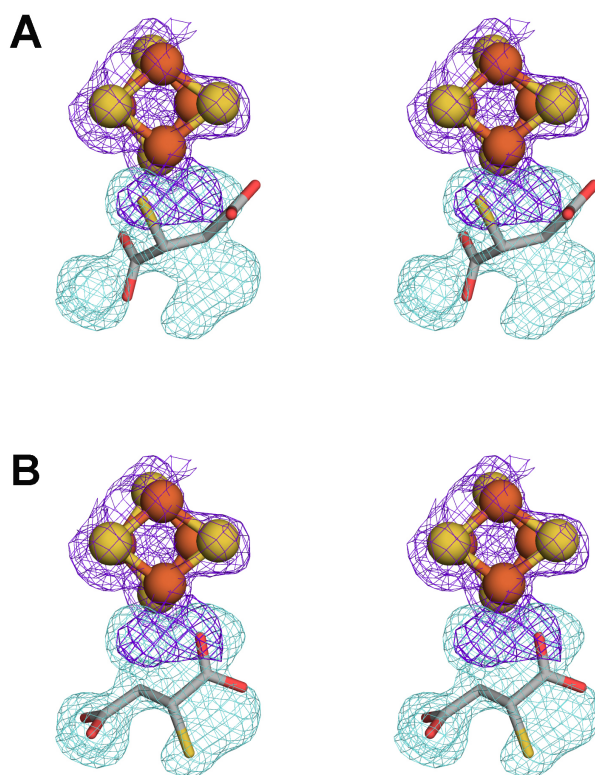

**Figure S2. Stereo view of *R*-2-thiomalate modeled in the active site of LmFH-2.** *R*-2-thiomalate (grey) was modeled in two possible orientations (**A** and **B**) into  $F_o-F_c$  difference electron density map that was contoured at 3.0 rmsd (green mesh). Neither orientation of *R*-2-thiomalate is a good fit to the density. A sulfur anomalous difference electron density map contoured at 3.0 rmsd (purple mesh) indicates that the sulfur atom of 2-thiomalate must be coordinated to the unique Fe of the [4Fe-4S] cluster (orange (Fe) and yellow (S) spheres). (**A**) When the C2-thiol group of *R*-2-thiomalate is placed into the sulfur anomalous difference density, the rest of the molecule is a poor fit to the  $F_o-F_c$  difference electron density map. This orientation of *R*-2-thiomalate also clashes with amino acids in the active site (not shown). (**B**) When *R*-2-thiomalate is positioned such that its C2-thiol group is pointed away from the cluster, the overall fit to the  $F_o-F_c$  difference electron density map is better, but there is no sulfur anomalous signal to support this orientation of the *R*-enantiomer.

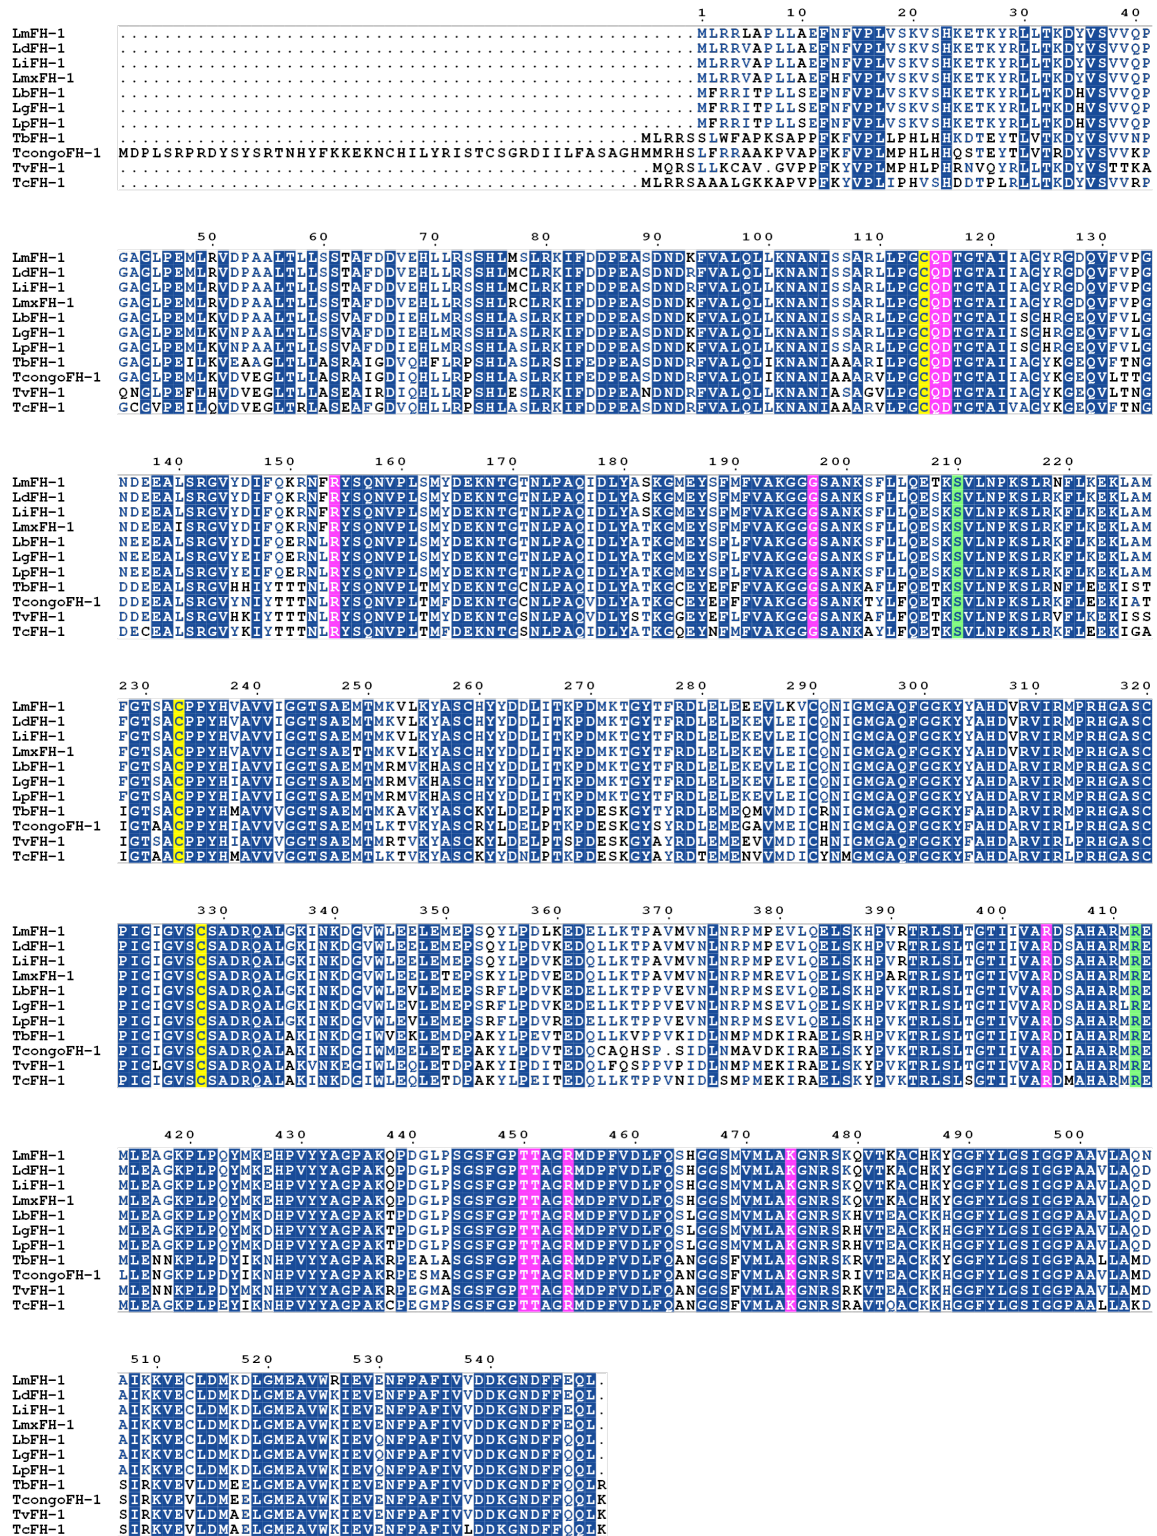

**Figure S3. Sequence alignment of mitochondrial class I FH isoforms.** LmFH-1 (*Leishmania major*), LdFH-1 (*Leishmania donovani*), LiFH-1 (*Leishmania infantum*), LmxFH-1 (*Leishmania mexicana*), LbFH-1 (*Leishmania braziliensis*), LgFH-1 (*Leishmania guyanensis*), LpFH-1 (*Leishmania panamensis*), TbFH-1 (*Trypanosoma brucei*), TcongoFH-1 (*Trypanosoma congolense*), TvFH-1 (*Trypanosoma vivax*), TcFH-1 (*Trypanosoma cruzi*). Conserved residues are in blue boxes; similar residues are in blue text; active site residues that bind the inhibitor *S*-2-thiomalate are in pink boxes; cysteine residues that coordinate the [4Fe-4S] cluster are in yellow boxes; dimer interface residues Ser-210 and Arg-412 are in green boxes. The alignment was performed using MULTALIN<sup>2</sup> and graphically displayed using ESPrInt.<sup>3</sup>

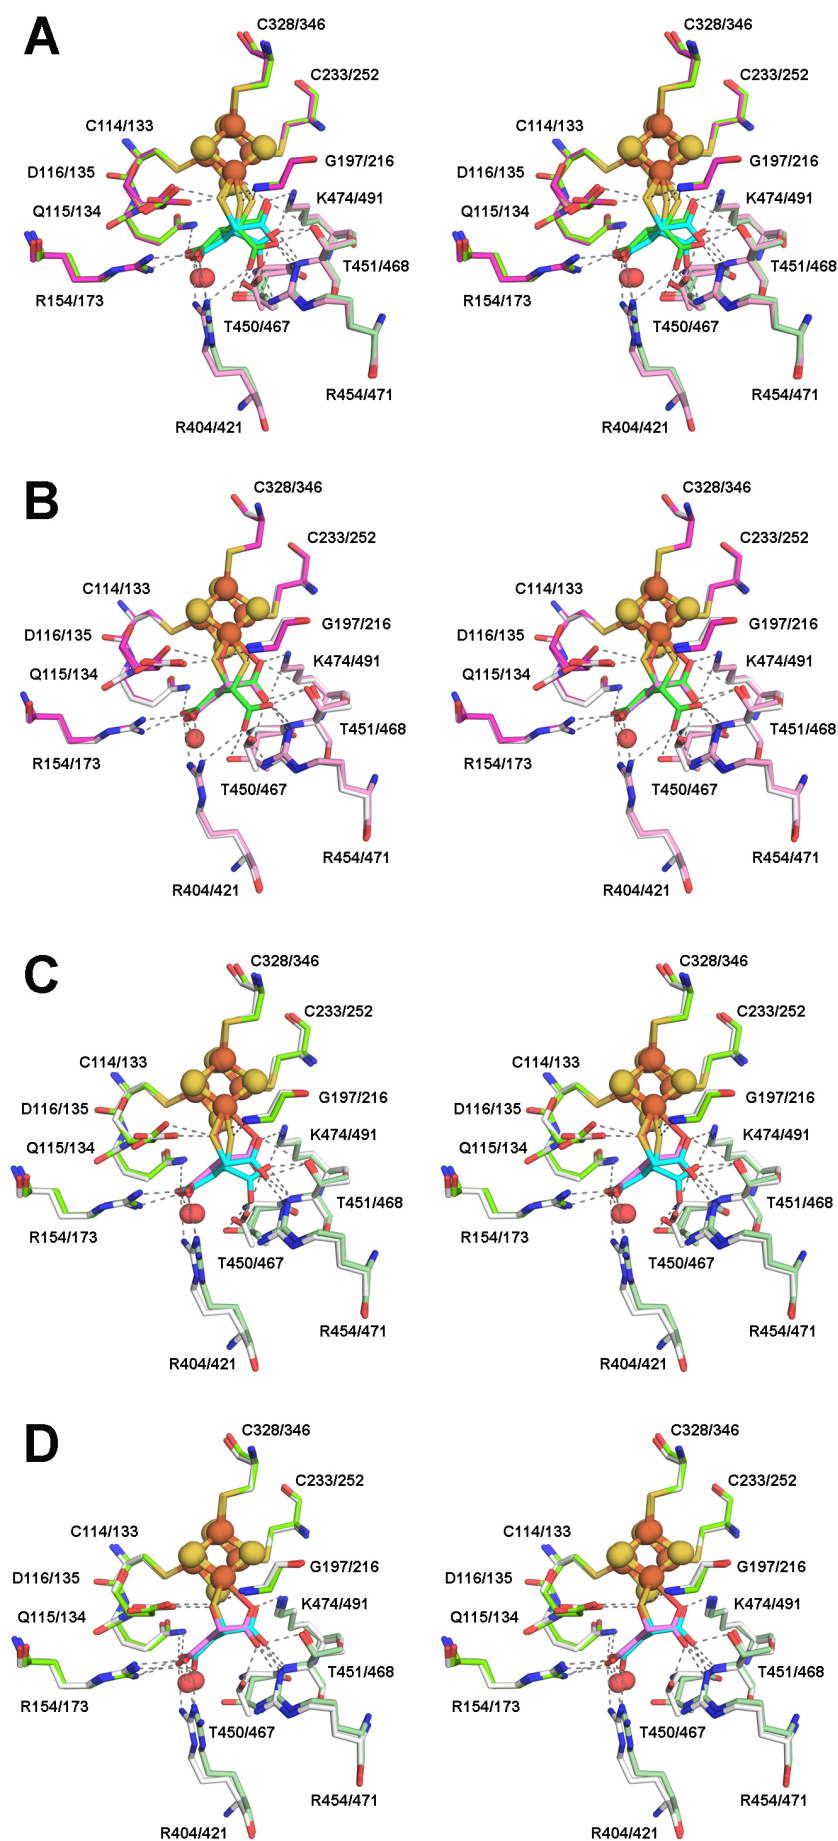

**Figure S4. Stereo view of LmFHs active sites in a complex with *S*-2-thiomalate and *S*-malate.** (A) Superposition of LmFH-1 (green) and LmFH-2 (pink) active sites in a complex with *S*-2-thiomalate (green and cyan, double conformation). (B) Superposition of LmFH-2 (pink) in a complex with *S*-2-thiomalate (green, double conformation) and LmFH-2 (white) in a complex with *S*-malate (violet). (C) Superposition of LmFH-1 (green) in a complex with *S*-2-thiomalate (cyan, double conformation) and LmFH-2 (white) in a complex with *S*-malate (violet). (D) Superposition of LmFH-1 (green) in a complex with *S*-2-thiomalate (cyan, canonical conformation) and LmFH-2 (white) in a complex with *S*-malate (violet). The [4Fe-4S] cluster is shown in orange (Fe) and yellow (S) spheres. The water molecule is shown in red sphere. The residue numbers separated by a slash are from LmFH-1/LmFH-2. The PDB code of LmFH-2 in a complex with *S*-malate is 5L2R.

## References

- (1) Chen, V. B., Arendall, W. B., III, Headd, J. J., Keedy, D. A., Immormino, R. M., Kapral, G. J., Murray, L. W., Richardson, J. S., and Richardson, D. C. (2010) MolProbity: all-atom structure validation for macromolecular crystallography, *Acta Crystallogr. D Biol. Crystallogr.* *66*, 12–21.
- (2) Corpet, F. (1988) Multiple sequence alignment with hierarchical-clustering, *Nucleic Acids Res.* *16*, 10881–10890.
- (3) Gouet, P., Courcelle, E., Stuart, D. I., and Metz, F. (1999) ESPript: analysis of multiple sequence alignments in PostScript, *Bioinformatics* *15*, 305–308.
